# Supplementary material for: The PI3Kδ Inhibitor Idelalisib Inhibits Homing in an in Vitro and in Vivo Model of B ALL
Source: MDPI journal article supplement (doi:10.3390/cancers9090121), 2017-09-10

**Supplementary Table S1: Characteristics of Human ALL cells**

| <b>Human leukemia ID</b> | <b>Immuno-phenotype</b> | <b>Sample type</b> | <b>Cytogenetics</b>         |
|--------------------------|-------------------------|--------------------|-----------------------------|
| <b>LAX7</b>              | Pre B ALL               | Diagnosis          | Normal                      |
| <b>LAX7R</b>             | Pre B ALL               | Relapse of LAX7    | KRASG12V                    |
| <b>ICN24</b>             | Pre B ALL               | Diagnosis          | Unknown                     |
| <b>LAX53</b>             | Pre B ALL               | Diagnosis          | Unknown                     |
| <b>LAX56</b>             | Pre B ALL               | Relapse            | t(Y;7)(p1.3;p13)            |
| <b>LAX57</b>             | Pre B ALL               | Diagnosis          | t(1;9)(q44;p22)             |
| <b>TXL3</b>              | Pre B ALL               | Diagnosis          | BCR-ABL1 p210               |
| <b>SFO2</b>              | Pre B ALL               | Relapse            | BCR-ABL1 p210               |
| <b>ICN12</b>             | Pre B ALL               | Diagnosis          | E2A-PBX1                    |
| <b>ICN13</b>             | Pro B ALL               | Diagnosis          | MLL-AF4<br>t(4;11)(q21;q23) |
| <b>BEL-1</b>             | Pro B ALL               | Diagnosis          | MLL-AF4<br>t(4;11)(q21;q23) |
| <b>RS4;11</b>            | Pro B ALL               | Diagnosis          | MLL-AF4<br>t(4;11)(q21;q23) |
| <b>Kasumi-2</b>          | Pre B ALL               | Diagnosis          | E2A-PBX1                    |

**S1. ALL cells migrate less to medium control than to SDF-1 $\alpha$  and this migration is unaffected by PI3K $\delta$  inhibitors.** Transwell migration assay of ALL cells treated with a PI3K $\delta$  inhibitor compared to DMSO control, all without a chemoattractant. This experiment was run in parallel to the one with SDF-1 $\alpha$  and serves as a control – the percentages graphed are all relative to the DMSO control migration towards SDF-1 $\alpha$  from Figure 4. Mean of triplicates  $\pm$  95% CI. There is no significant difference in migration using this assay between treated and untreated samples for ALL cells without SDF-1 $\alpha$ .

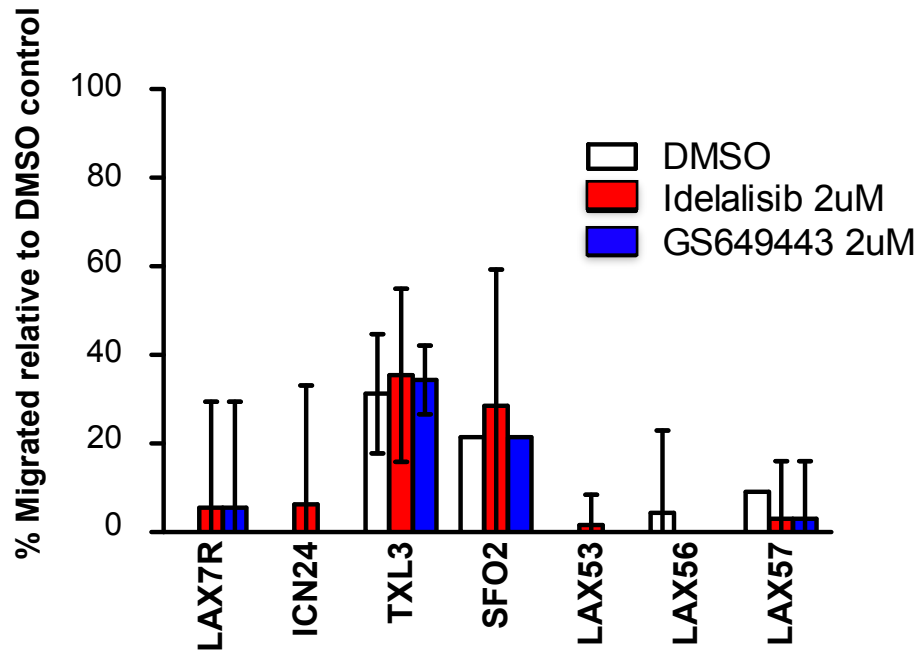

**S2. Treatment with PI3Kδ inhibitors idelalisib decreases migration toward SDF-1α (200ng/ml).** Transwell migration assay of ALL cells towards SDF-1α (200ng/ml) comparing cells treated with different doses of idelalisib (0.1 μM, 0.5 μM and 2 μM) to DMSO control. Mean of triplicates +/- 95% CI. All samples treated with 0.5μM and 2μM idelalisib show significant decrease in migration compared to untreated samples (\*= p<0.05, \*\*=p<0.001, \*\*\*=p<0.005).

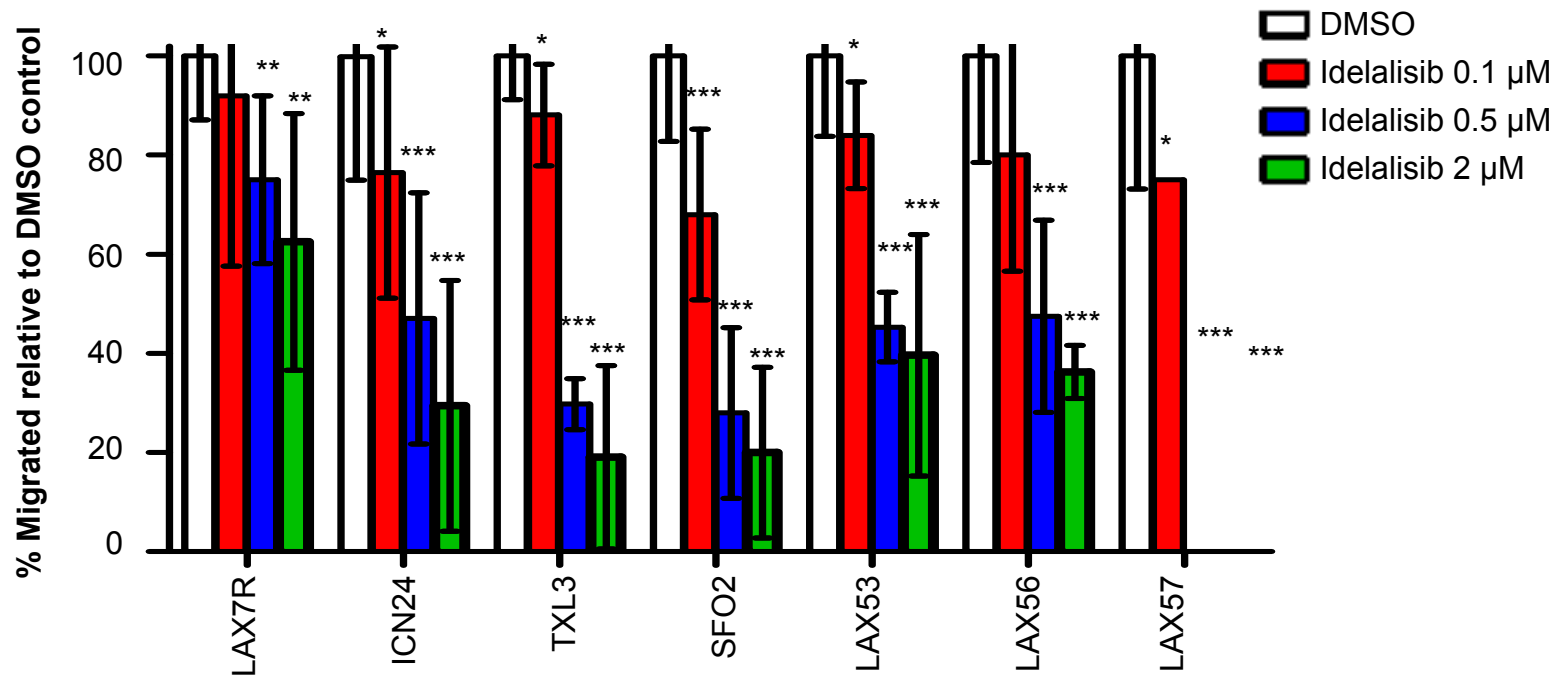

**S3. Effect of Idelalisib on proliferation of ALL cells alone and in combination with different concentrations of Vincristine.** Mean of 3 counts under trypan blue exclusion is graphed +/- SD for days 3 and 5, day 0 is plotted based on amount of cells first plated. 3 different doses of Vincristine (VCR) (0.5, 1 and 5 nM) were tested. Idelalisib (Idela) concentration is 2µM in all instances below where it is used. Also inset is a table of p-values from t-test comparisons of results of different conditions at Day 5. P-values >0.05 are listed as not significant (N/ S).

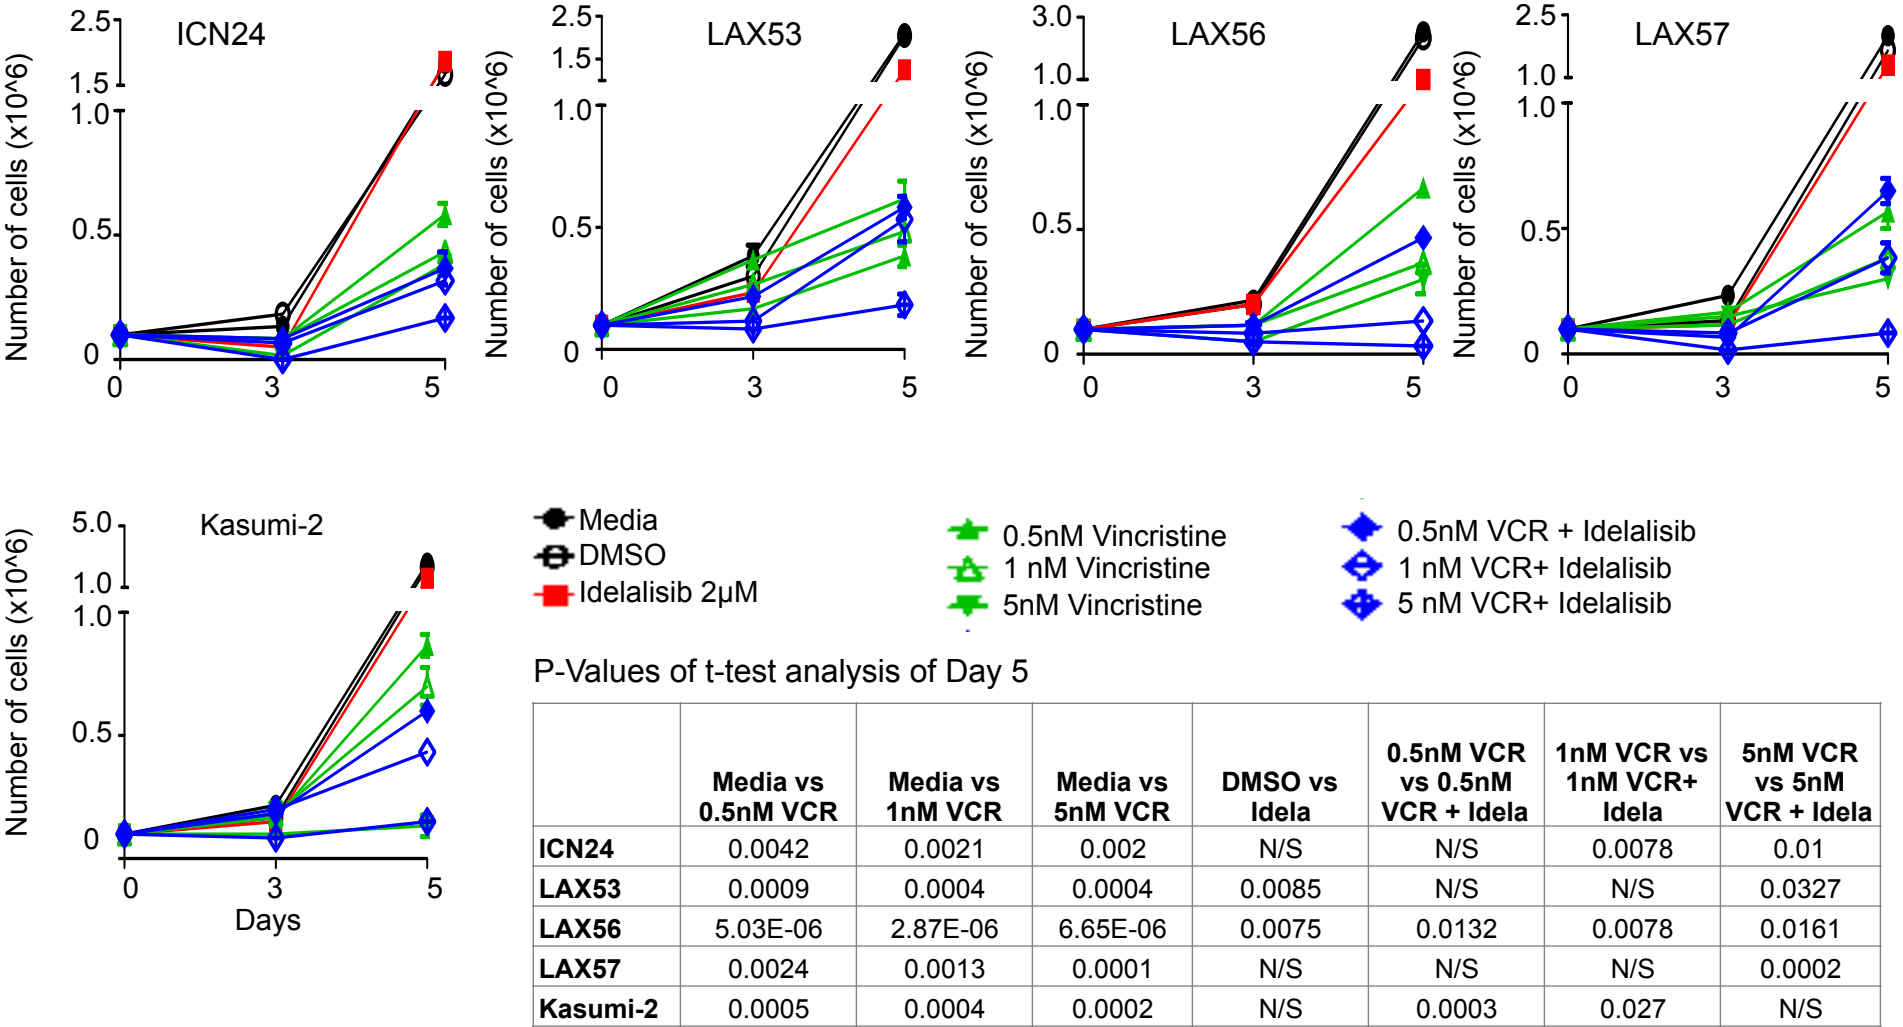

Supplement: s1 [file s1]
